# Supplementary material for: The impact of digital health interventions on health-related outcomes in the workplace: A systematic review
Source: PubMed Central journal article supplement — Digit Health. 2018 May 10;4:2055207618770861. doi: 10.1177/2055207618770861 (PMC6016571; doi:10.1177/2055207618770861), 2018-05-10
Supplement: Supplemental_material.pdf [file Supplemental_material.pdf]

## Supplementary file 1. Search terms

| (work*<br>OR                  | AND | (digital<br>OR       | AND | (health<br>OR             | AND | (treatment<br>OR |
|-------------------------------|-----|----------------------|-----|---------------------------|-----|------------------|
| corporate                     |     | Mhealth              |     | wellbeing/<br>well-being) |     | intervention)    |
| white-collar                  |     | web*                 |     |                           |     |                  |
| professional                  |     | Internet             |     |                           |     |                  |
| labour/labor                  |     | ehealth/<br>e-health |     |                           |     |                  |
| industrial                    |     | Apps                 |     |                           |     |                  |
| staff                         |     | Computer             |     |                           |     |                  |
| organization/<br>organisation |     | Smartphone           |     |                           |     |                  |
| employ*)                      |     | online)              |     |                           |     |                  |

**Table 3. Risk of bias summary**

|                      | Random sequence generation (selection bias) | Allocation concealment (selection bias) | Blinding of outcome assessment (detection bias) | Selective reporting (reporting bias) |
|----------------------|---------------------------------------------|-----------------------------------------|-------------------------------------------------|--------------------------------------|
| Bolier, 2014         | L                                           | L                                       | U                                               | L                                    |
| Bostock, 2016        | L                                           | L                                       | L                                               | L                                    |
| Brendryen, 2017      | L                                           | L                                       | H                                               | L                                    |
| Cook, 2007           | L                                           | U                                       | U                                               | L                                    |
| Cook, 2015           | L                                           | H                                       | U                                               | L                                    |
| Deitz, 2014          | L                                           | U                                       | U                                               | L                                    |
| Doumas, 2007         | L                                           | U                                       | U                                               | L                                    |
| Griffiths, 2016      | L                                           | U                                       | U                                               | L                                    |
| Irvine, 2011         | L                                           | U                                       | U                                               | L                                    |
| Ketelaar, 2014       | L                                           | U                                       | U                                               | L                                    |
| Khadjesar, 2014      | L                                           | U                                       | H                                               | L                                    |
| Mainsbridge, 2014    | L                                           | H                                       | L                                               | L                                    |
| Matano, 2006         | L                                           | U                                       | U                                               | L                                    |
| Pedersen, 2014       | L                                           | H                                       | U                                               | L                                    |
| Querstret, 2016      | L                                           | L                                       | U                                               | L                                    |
| Schell, 2008         | L                                           | L                                       | U                                               | L                                    |
| Shimazu, 2005        | L                                           | U                                       | U                                               | L                                    |
| Solenhill, 2016      | L                                           | U                                       | U                                               | L                                    |
| Umanodan, 2014       | L                                           | L                                       | U                                               | L                                    |
| Van der Heuvel, 2003 | L                                           | U                                       | U                                               | L                                    |
| Westrup, 2003        | L                                           | U                                       | U                                               | L                                    |
| Zhang, 2017          | L                                           | U                                       | U                                               | L                                    |

<sup>a</sup> L = low risk of bias, U = unclear risk of bias, H = high risk of bias
